# Supplementary material for: PHD3 Acts as Tumor Suppressor in Mouse Osteosarcoma and Influences Tumor Vascularization via PDGF-C Signaling
Source: MDPI journal article supplement (doi:10.3390/cancers10120496), 2018-12-06

## PHD3 Acts as Tumor Suppressor in Mouse Osteosarcoma and Influences Tumor Vascularization via PDGF-C Signaling

Antje Egners, Maryam Rezaei, Aleksandar Kuzmanov, David M. Poitz, Doreen Streichert, Thomas Müller-Reichert, Ben Wielockx and Georg Breier

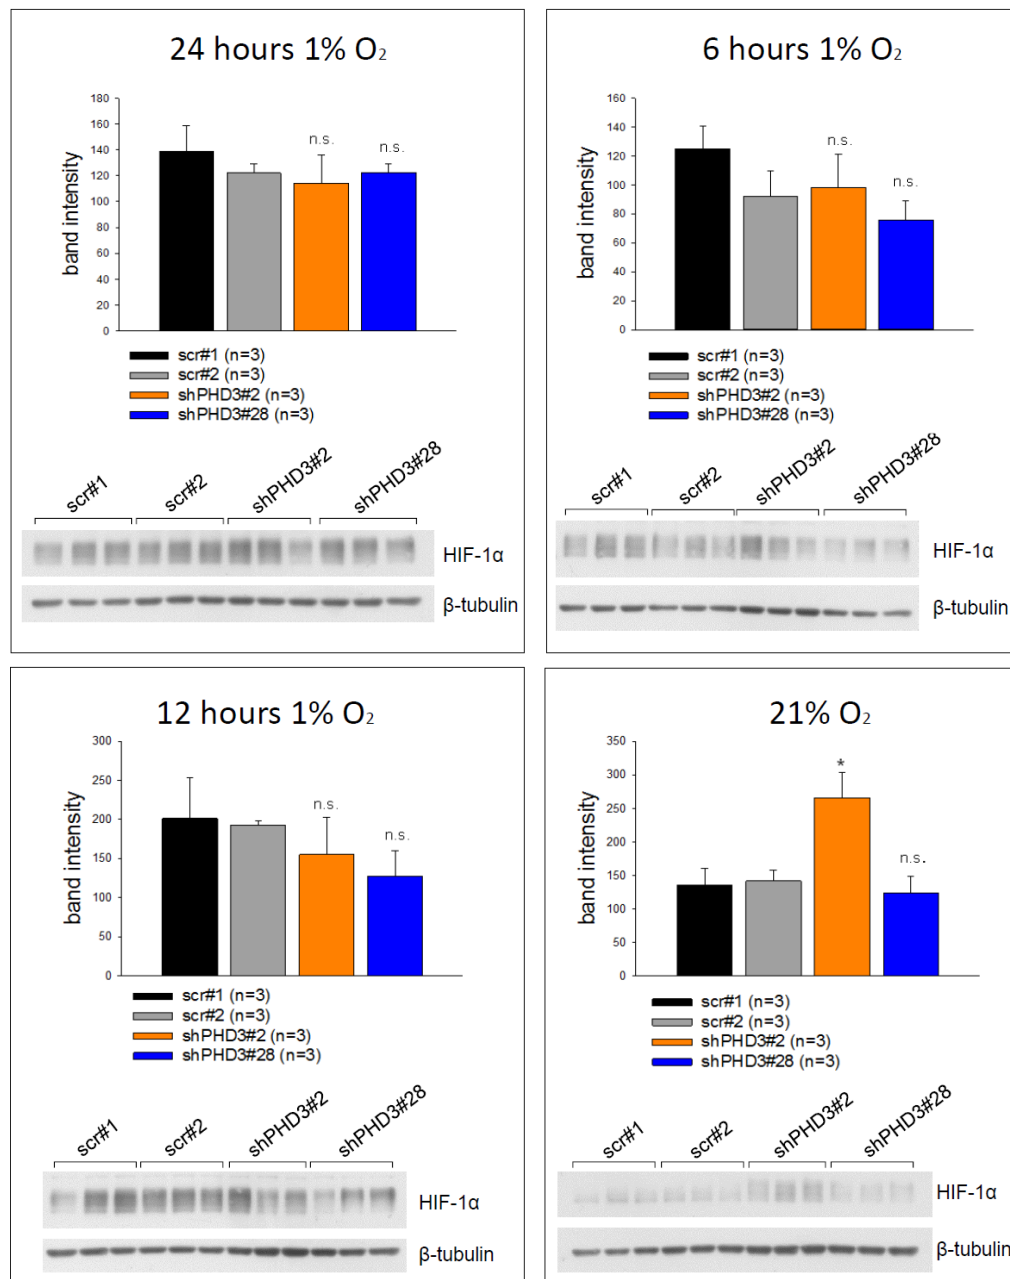

**Figure S1.** HIF-1 $\alpha$  protein levels are not altered in LM8 cells cultured in hypoxic conditions.

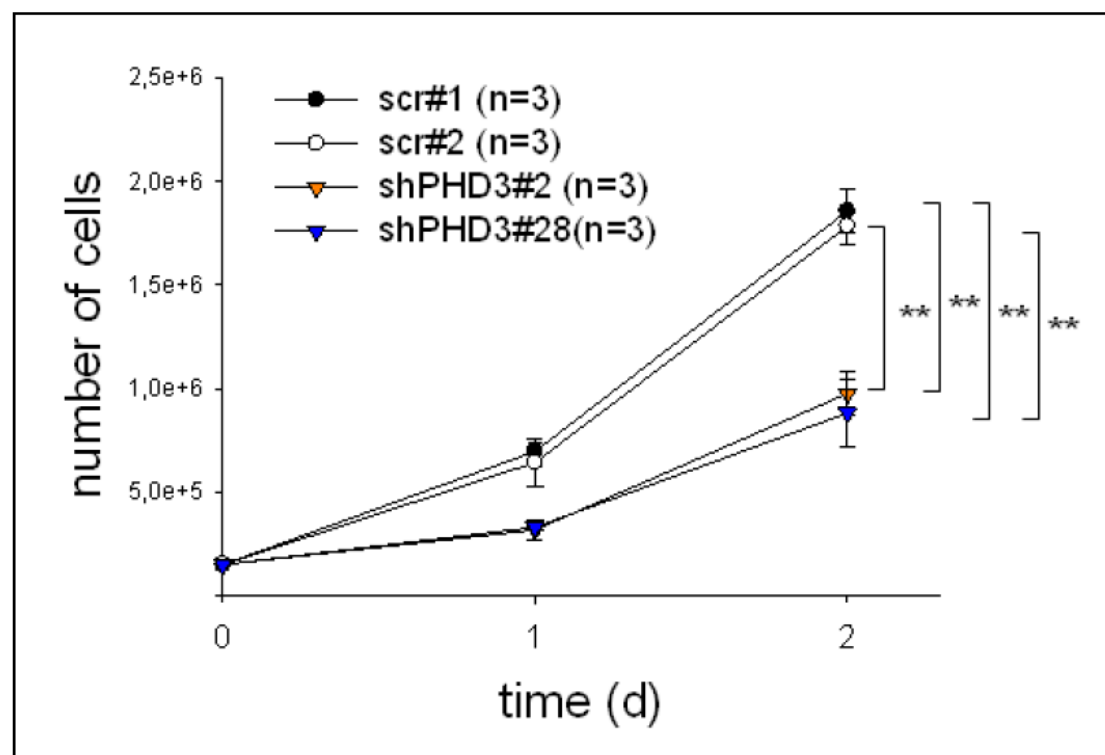

Figure S2. In vitro proliferation assay of shPHD3 and control clones.

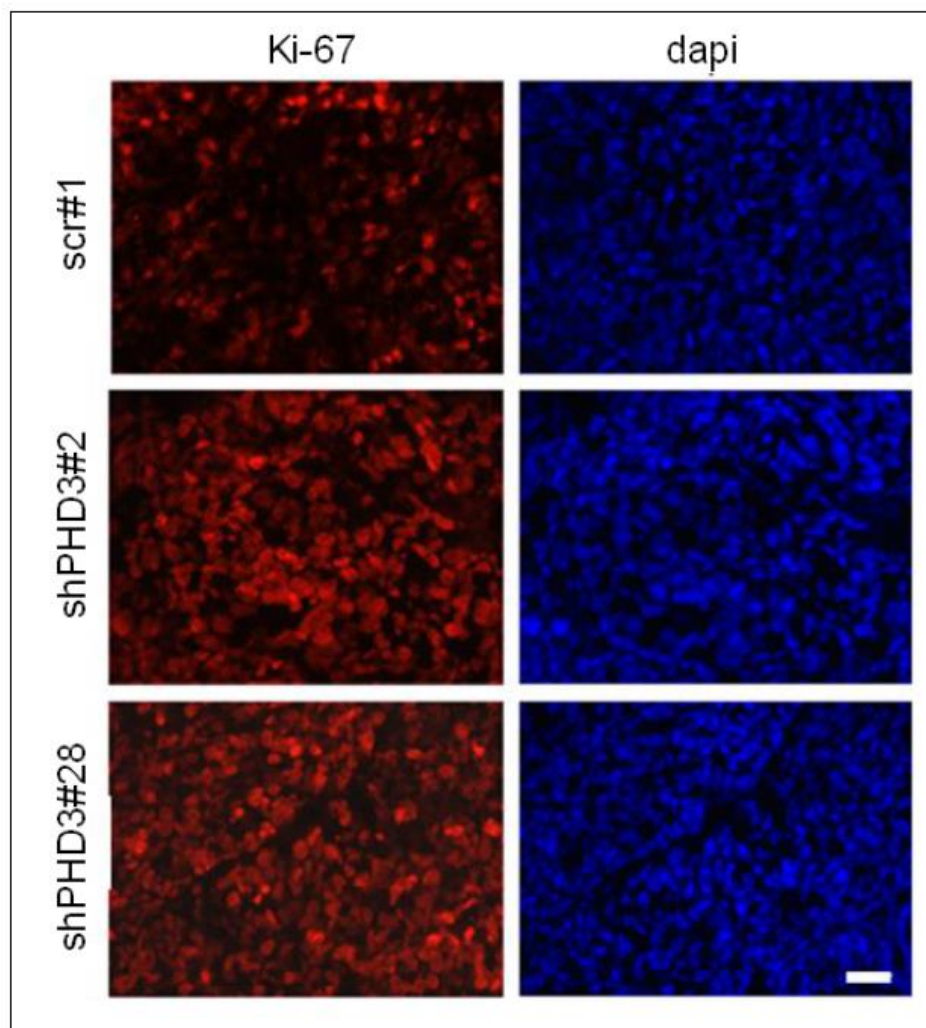

**Figure S3.** PHD3-deficient tumors are more proliferative.

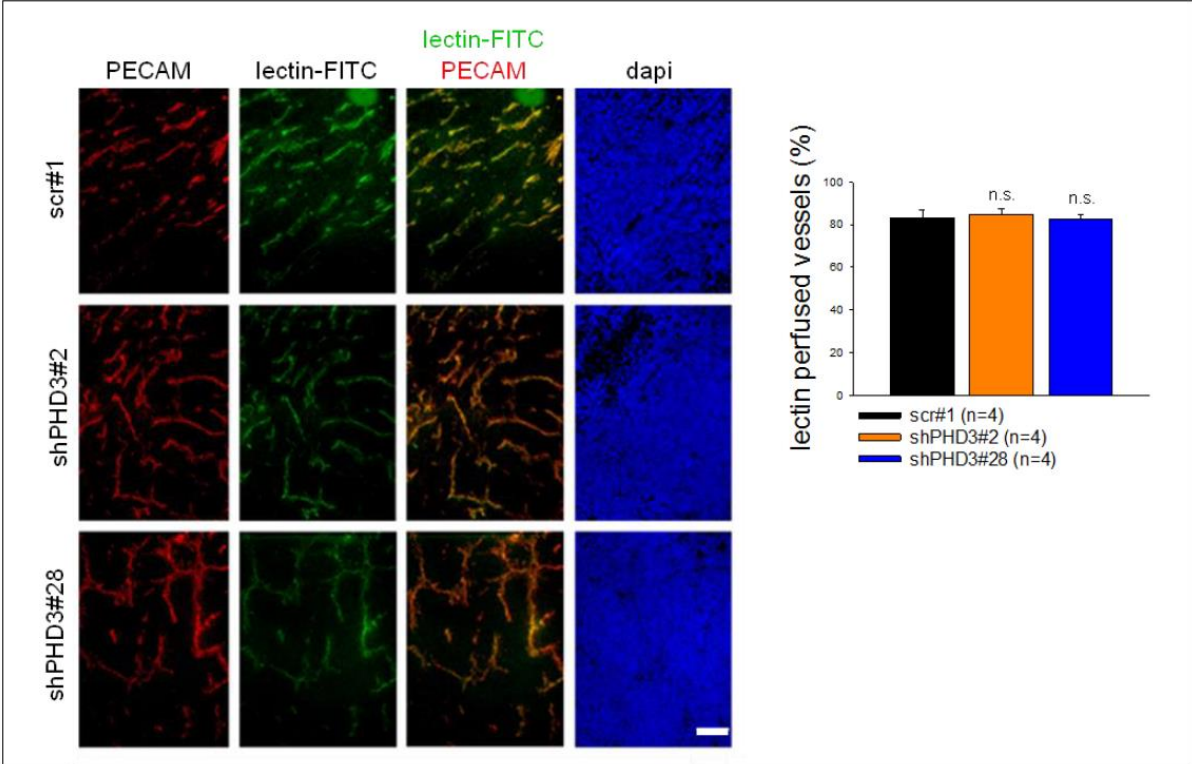

**Figure S4.** Vessel perfusion in shPHD3 and control tumors.

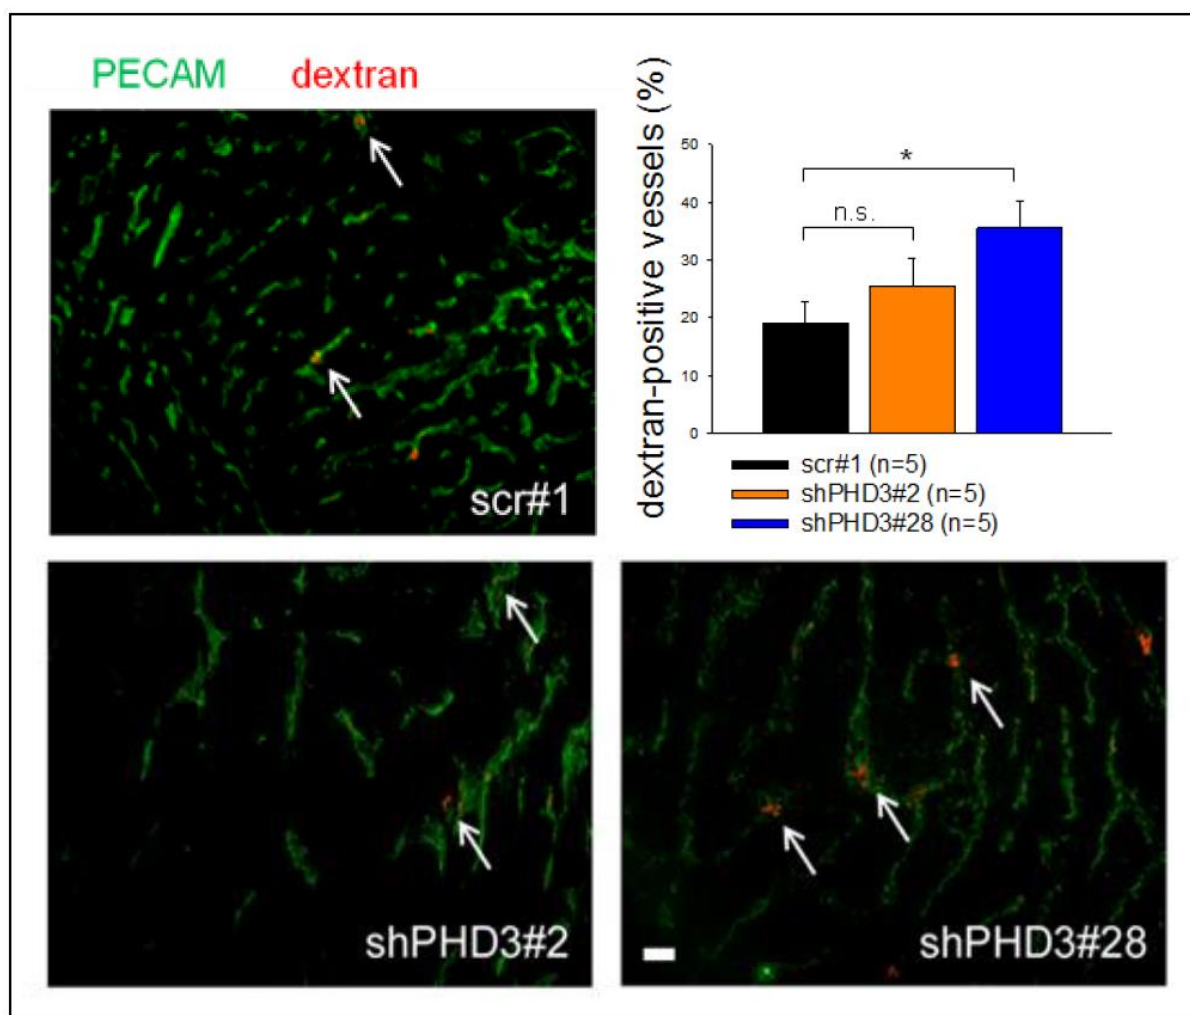

Figure S5. Vessel leakiness in shPHD3 and control tumors.

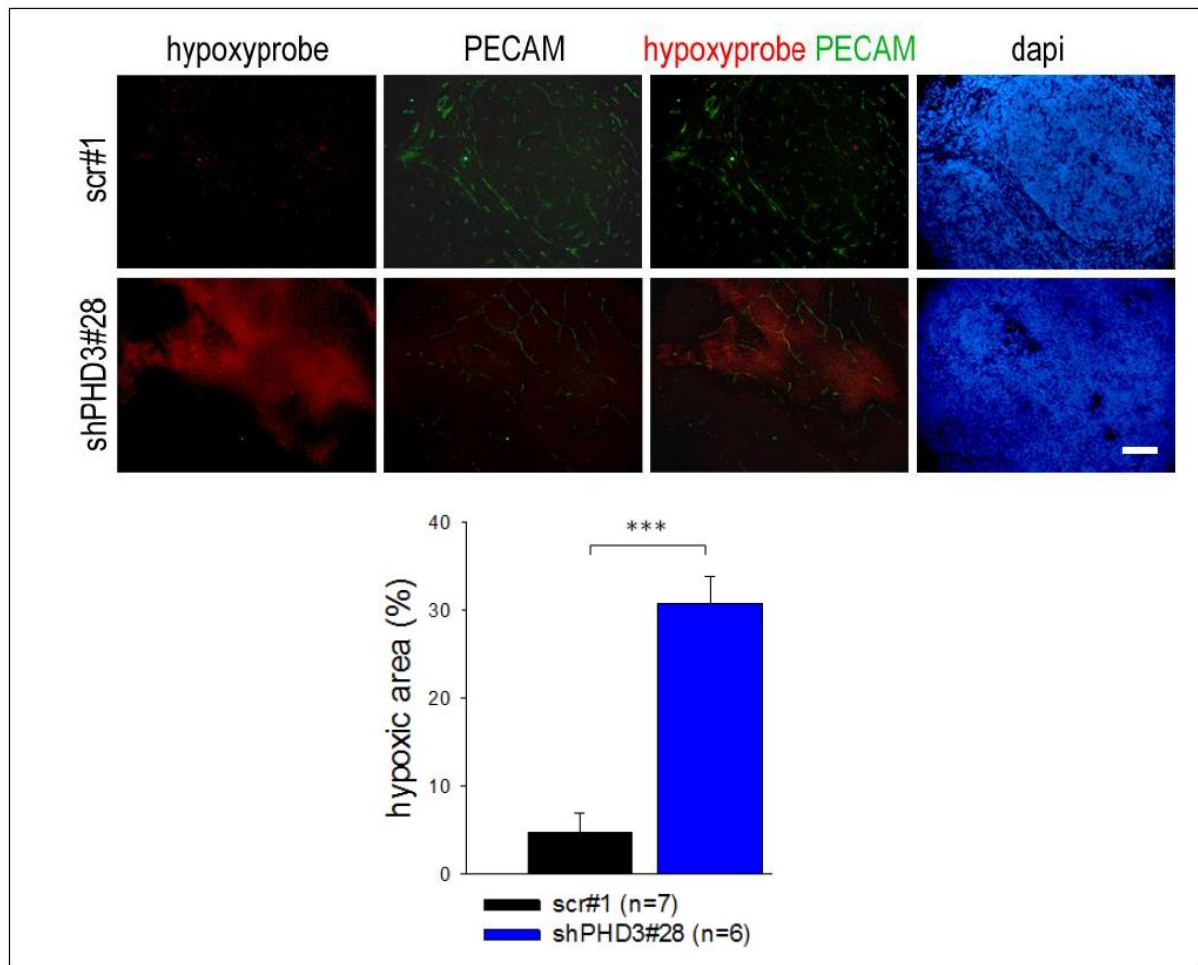

**Figure S6.** ShPHD3#28 tumors are more hypoxic than control tumors.

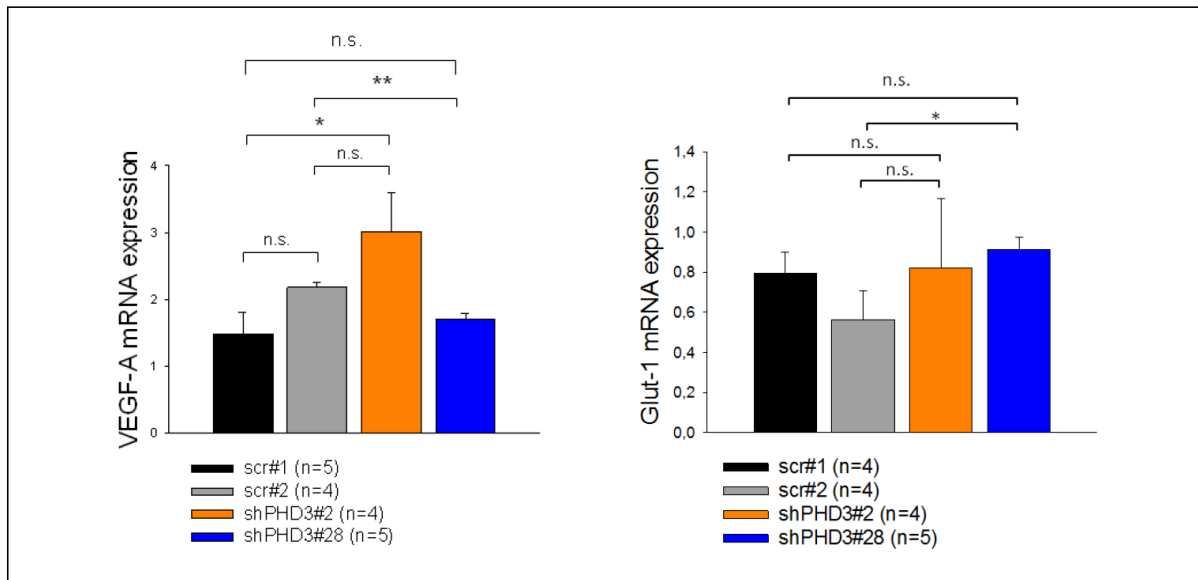

**Figure S7.** Silencing of PHD3 does not influence the VEGF-A or Glut-1 expression in LM8 tumors.

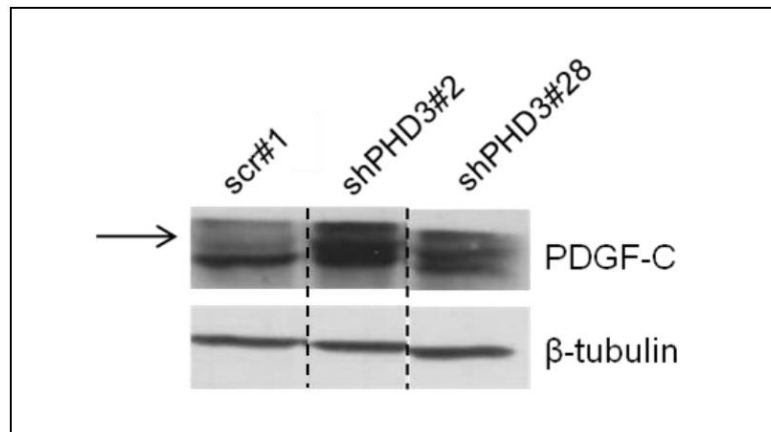

**Figure S8.** PDGF-C is up-regulated by reduction of PHD3 in vitro.

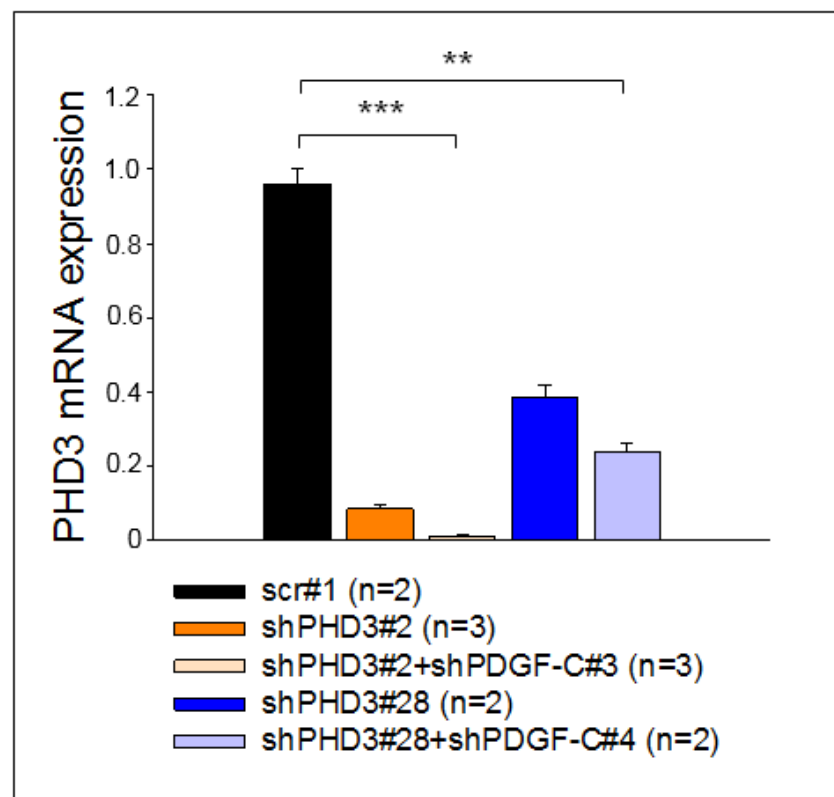

**Figure S9.** PHD3 expression in double knock down LM8 clones.



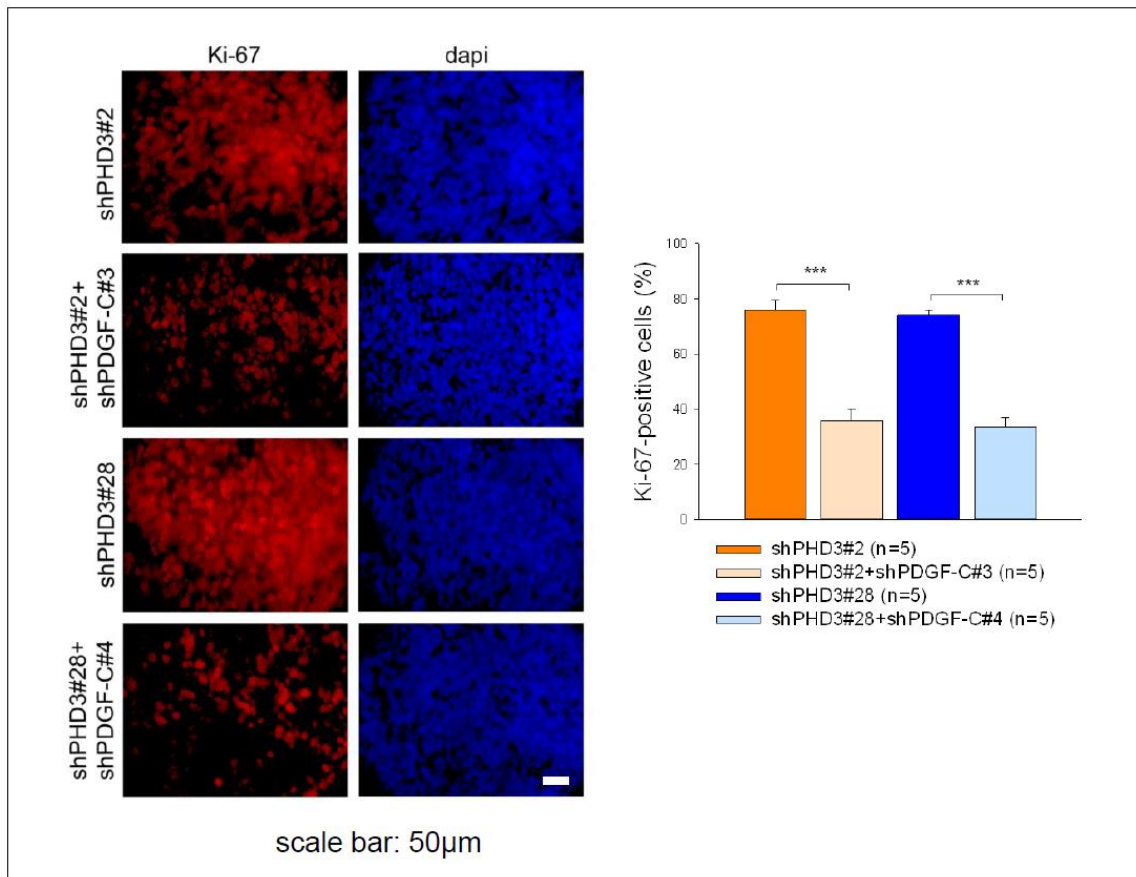

**Figure S10.** ShPHD3+shPDGF-C double knock-down tumors are less proliferative compared to tumors in which PHD3 was silenced only.

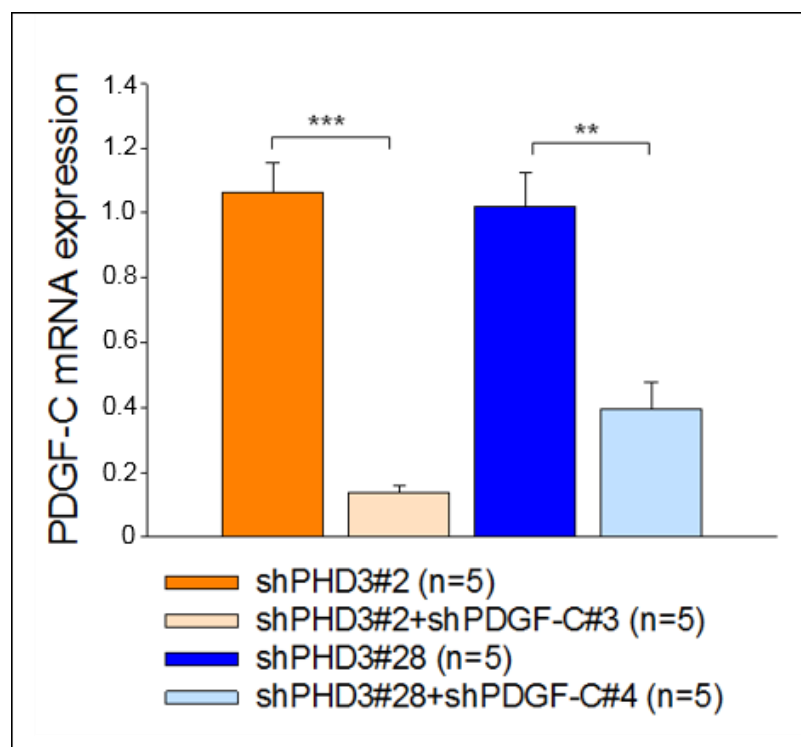

**Figure S11.** PDGF-C is significantly reduced in shPHD3 + shPDGF-C LM8 tumors.



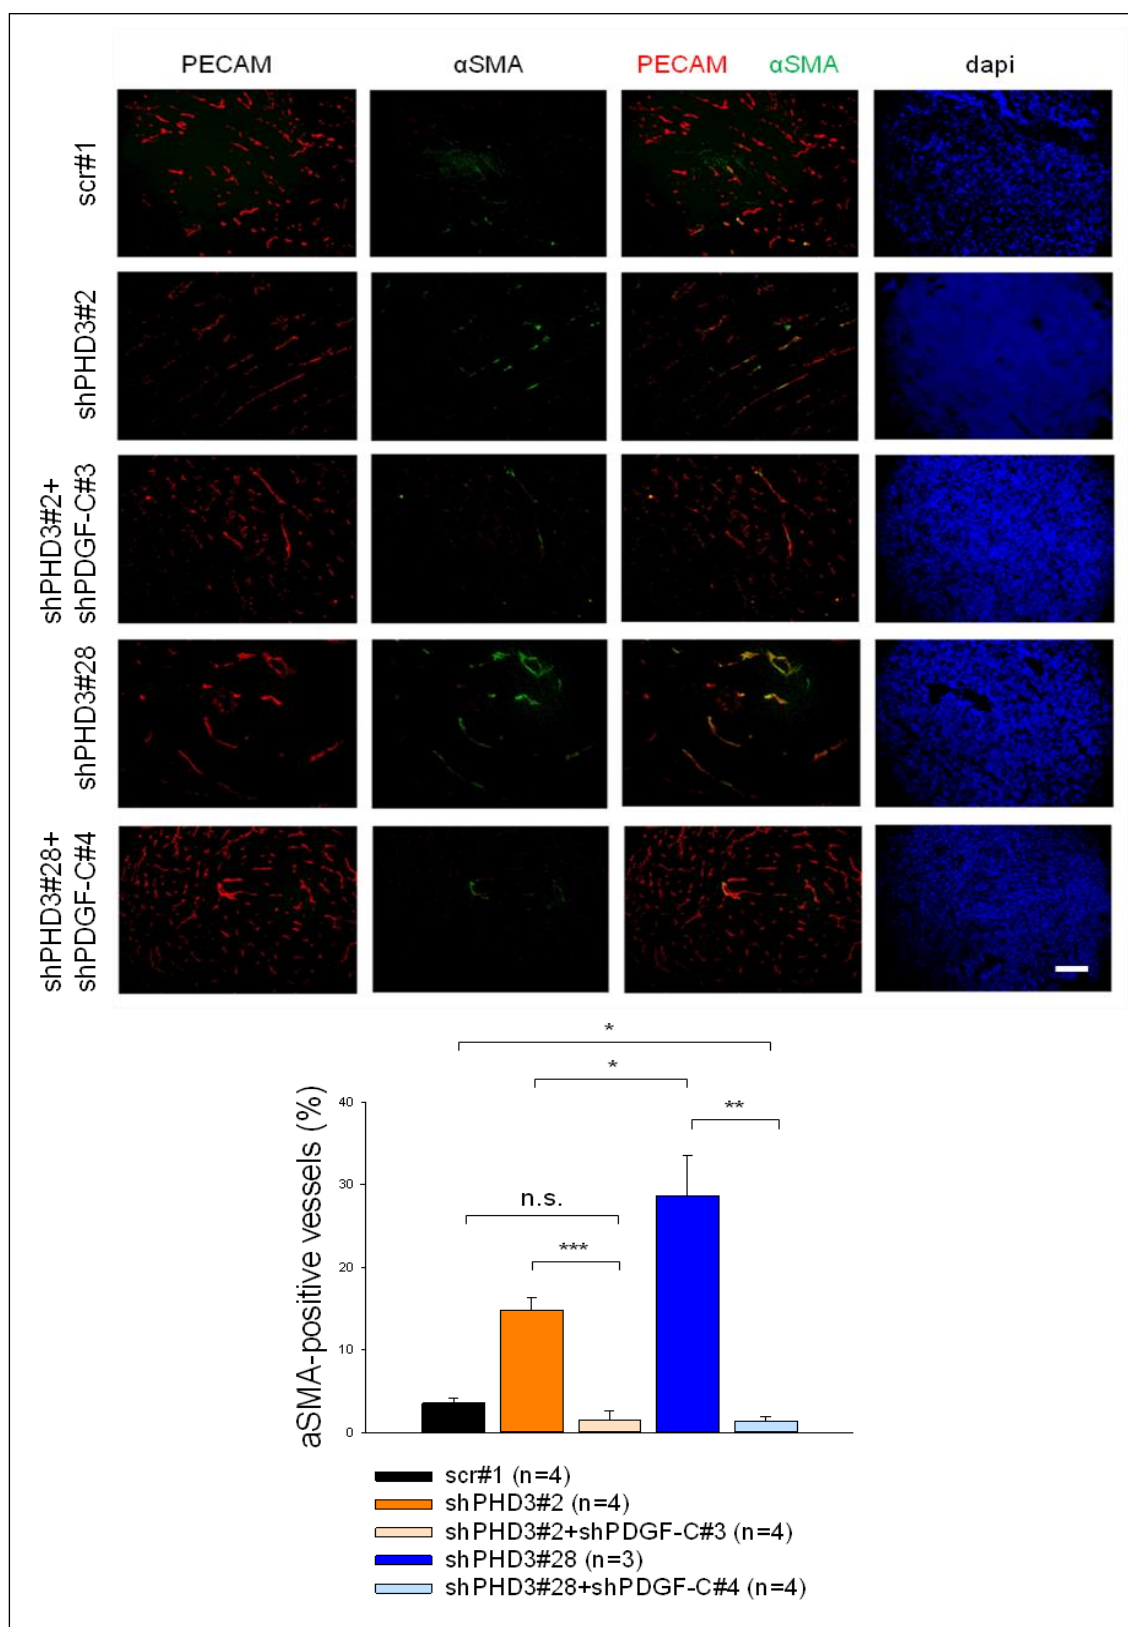

**Figure S12.** Knock down of PDGF-C in PHD3-deficient tumors reduces perivascular cell coverage of tumor vessels.

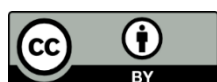

Supplement: s1 [file s1]
